# Supplementary material for: Synthesis of hierarchical porous CuO Nanowire@NiCo-layered double hydroxide core-shell structured nanoarrays on copper foam for high-performance supercapacitors
Source: Royal Society of Chemistry journal article supplement (doi:10.1039/c7ta04908k), 2017-01-01
Supplement: c7ta04908k1.pdf [file c7ta04908k1.pdf]

This article has been withdrawn for legal reasons.
